# Supplementary material for: Trace CO elimination in H2-rich streams with a wide operation temperature window: Co deposited CuO–CeO2 catalysts
Source: Royal Society of Chemistry journal article supplement (doi:10.1039/d1cp05121k), 2021-12-22
Supplement: d1cp05121k1.pdf [file d1cp05121k1.pdf]

**Supporting information for**

**Trace CO elimination in H<sub>2</sub>-rich streams with wide operation  
temperature window: Co deposited CuO-CeO<sub>2</sub> catalysts**

Zihuan Qiu<sup>a, 1</sup>, Xiaolin Guo<sup>b, 1</sup>, Jianxin Mao<sup>a</sup>, Renxian Zhou<sup>a, \*</sup>

<sup>a</sup> Institute of Catalysis, Zhejiang University, Hangzhou 310028, P.R China

<sup>b</sup> College of Materials and Chemistry, China Jiliang University, Hangzhou 310018,

P.R China

\*Corresponding author. Tel. and fax: +86 571 88273283.

E-mail address: [zhourenxian@zju.edu.cn](mailto:zhourenxian@zju.edu.cn).

<sup>1</sup> These two authors have the same contribution to this work.

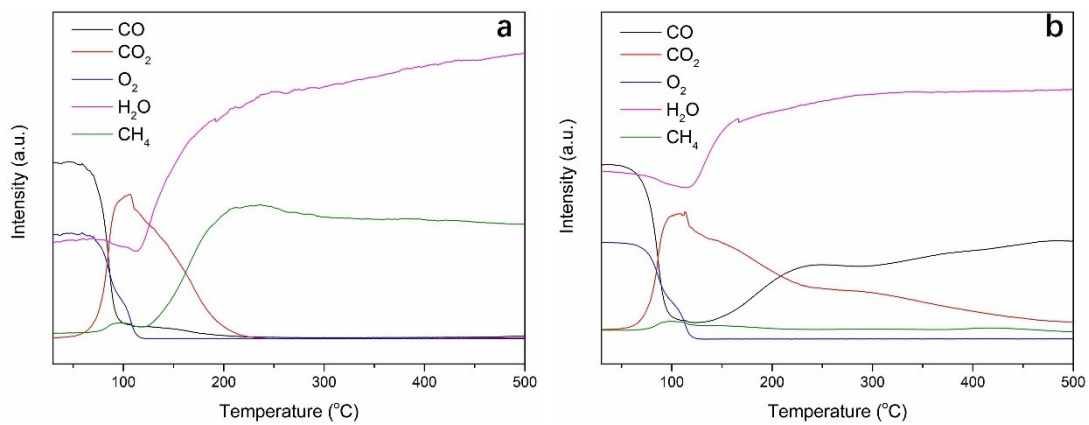

**Fig. S1** TPSR curves of (a) 1Co-CuCe and (b) CuCe.

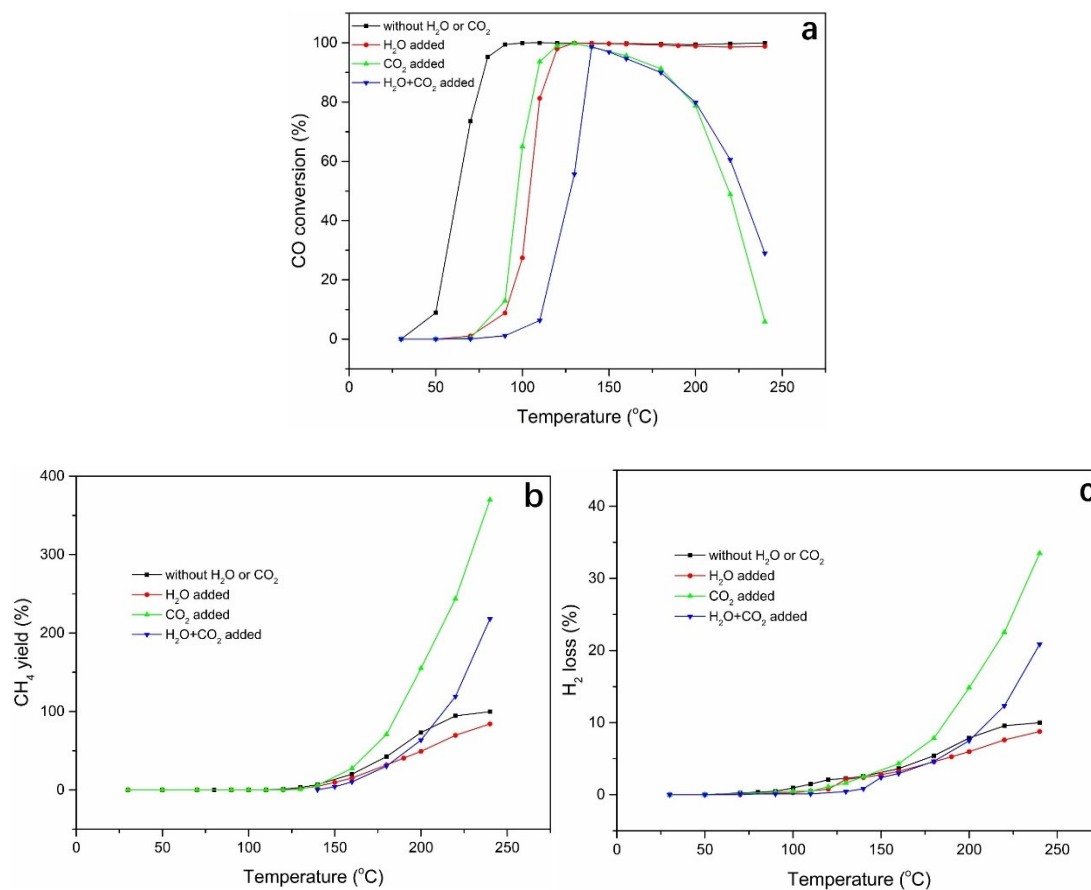

**Fig. S2 Catalytic performance of 1Co-CuCe catalyst with the presence of H<sub>2</sub>O or/and CO<sub>2</sub> in the feed stream. (a) CO conversion. (b) CH<sub>4</sub> yield. (c) H<sub>2</sub> loss.**

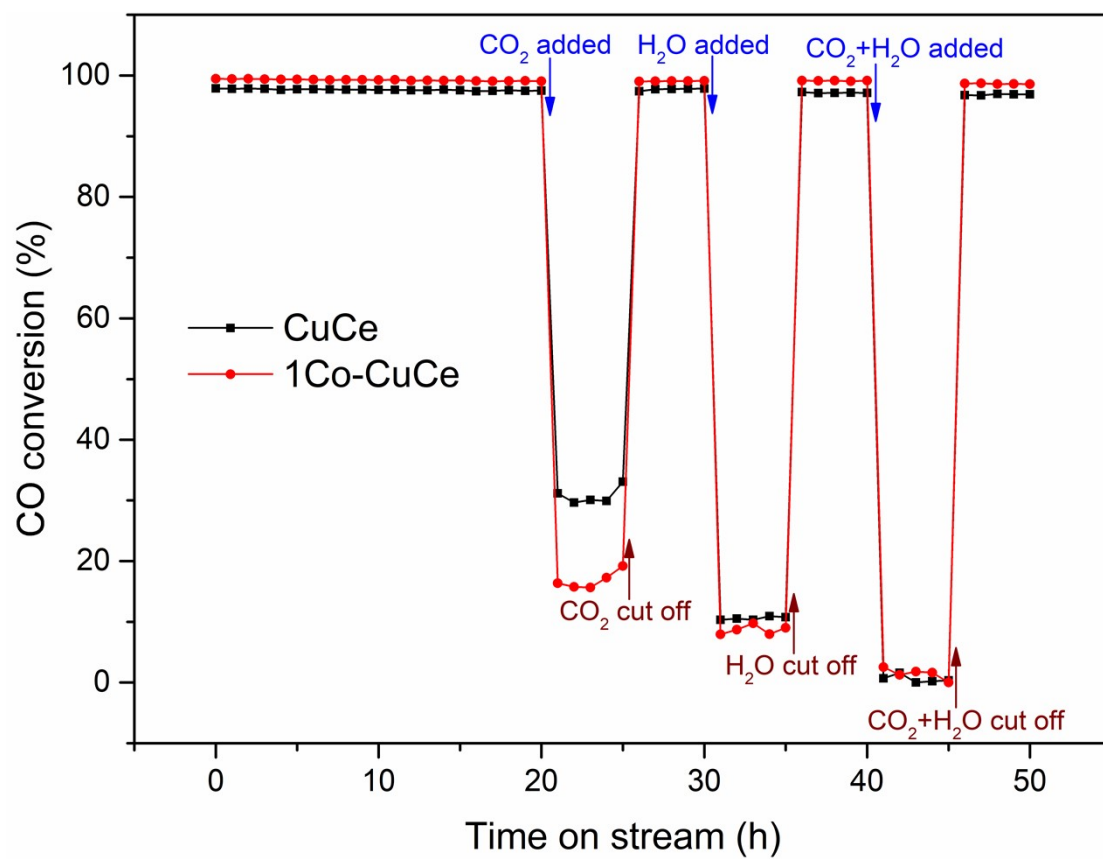

**Fig. S3 Stability of CuCe and 1Co-CuCe catalysts under 50 h of CO-PROX reaction with  $\text{H}_2\text{O}$  and/or  $\text{CO}_2$  added and cut off.**

**Table S1 Co<sub>3</sub>O<sub>4</sub> structure parameters of the Co deposited CuO-CeO<sub>2</sub> catalysts.**

| Catalyst    | Lattice parameter of<br>Co <sub>3</sub> O <sub>4</sub> (Å) | Grain size <sup>a</sup> (Å) | Microstrain <sup>a</sup> (10 <sup>-3</sup> ) |
|-------------|------------------------------------------------------------|-----------------------------|----------------------------------------------|
| 1/10Co-CuCe | -                                                          | -                           | -                                            |
| 1/4Co-CuCe  | 8.0836                                                     | 128.1/134.9/120.7           | 0.53/0.61/1.05                               |
| 1/2Co-CuCe  | 8.0812                                                     | 218.2/210.0/200.5           | 0.41/0.35/0.28                               |
| 3/4Co-CuCe  | 8.0804                                                     | 291.6/281.8/266.6           | 0.96/0.71/0.17                               |
| 1Co-CuCe    | 8.0829                                                     | 299.2/285.5/268.5           | 0.70/0.50/0.12                               |
| 5/4Co-CuCe  | 8.0827                                                     | 283.3/280.1/268.4           | 1.18/1.04/0.87                               |

<sup>a</sup>The crystalline size and microstrain of the three crystal planes of Co<sub>3</sub>O<sub>4</sub> basic grain, which are {111}, {110} and {311} from left to right.

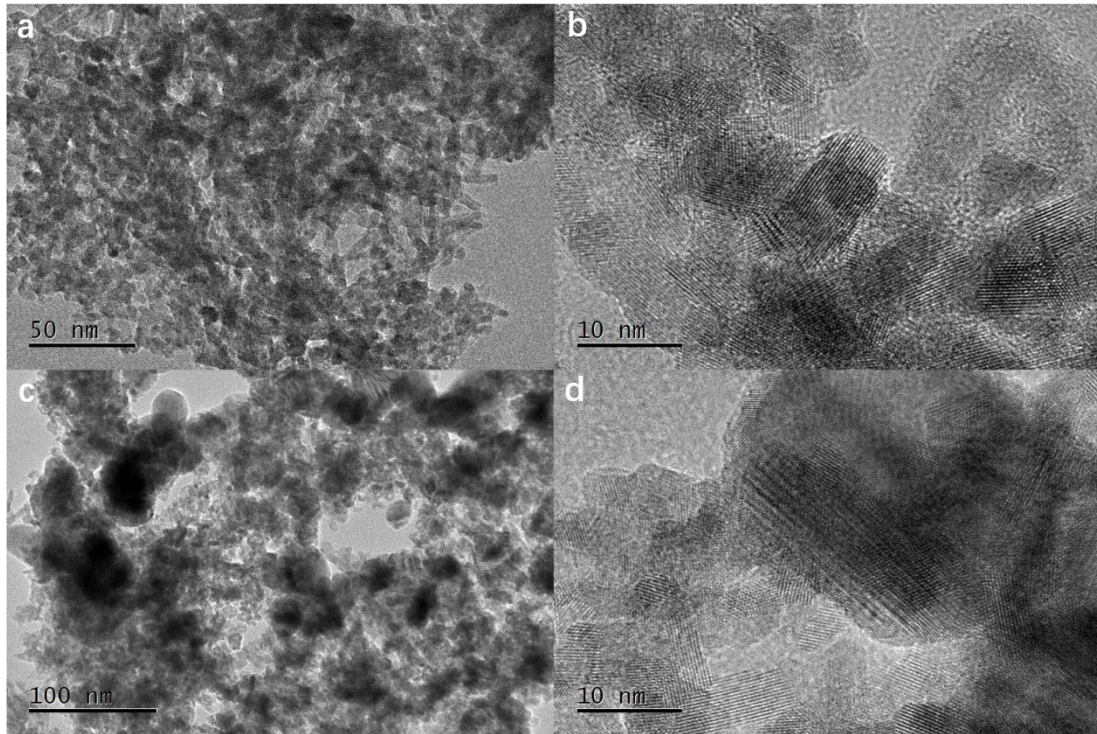

**Fig. S4 HRTEM images of CuCe (a, b) and 1Co-CuCe (c, d) catalysts after catalytic performance evaluation.**

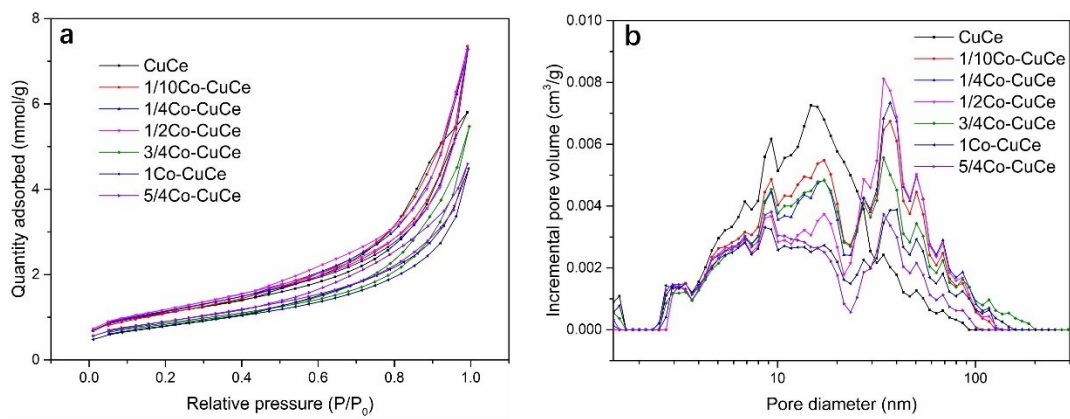

**Fig. S5** N<sub>2</sub> adsorption-desorption isotherms (a) and BJH desorption pore size distribution curves (b) of the Co deposited CuO-CeO<sub>2</sub> catalysts.

**Table S2 Reduction temperature and H<sub>2</sub> consumption of the H<sub>2</sub>-TPR peaks.**

| Catalyst    | Peak $\alpha$ |                            | Peak $\beta$ |                            | Peak $\gamma$ |                            | Peak $\delta$ |                            | Peak $\omega$ |                            |
|-------------|---------------|----------------------------|--------------|----------------------------|---------------|----------------------------|---------------|----------------------------|---------------|----------------------------|
|             | Tem.          | H <sub>2</sub> cons.       | Tem.         | H <sub>2</sub> cons.       | Tem.          | H <sub>2</sub> cons.       | Tem.          | H <sub>2</sub> cons.       | Tem.          | H <sub>2</sub> cons.       |
|             | (°C)          | ( $\mu\text{mol g}^{-1}$ ) | (°C)         | ( $\mu\text{mol g}^{-1}$ ) | (°C)          | ( $\mu\text{mol g}^{-1}$ ) | (°C)          | ( $\mu\text{mol g}^{-1}$ ) | (°C)          | ( $\mu\text{mol g}^{-1}$ ) |
| CuCe        | 166           | 485                        | 189          | 463                        | 200           | 391                        | -             | -                          | -             | -                          |
| 1/10Co-CuCe | 164           | 527                        | 189          | 513                        | 199           | 342                        | 232           | 448                        | -             | -                          |
| 1/4Co-CuCe  | 161           | 365                        | 193          | 804                        | -             | -                          | 230           | 1335                       | -             | -                          |
| 1/2Co-CuCe  | 160           | 322                        | 198          | 1267                       | -             | -                          | 259           | 2602                       | -             | -                          |
| 3/4Co-CuCe  | 154           | 294                        | 189          | 874                        | -             | -                          | 260           | 3071                       | -             | -                          |
| 1Co-CuCe    | 161           | 312                        | 194          | 1097                       | -             | -                          | 266           | 2029                       | -             | -                          |
| 5/4Co-CuCe  | 164           | 299                        | 192          | 633                        | -             | -                          | 278           | 3890                       | 325           | 944                        |



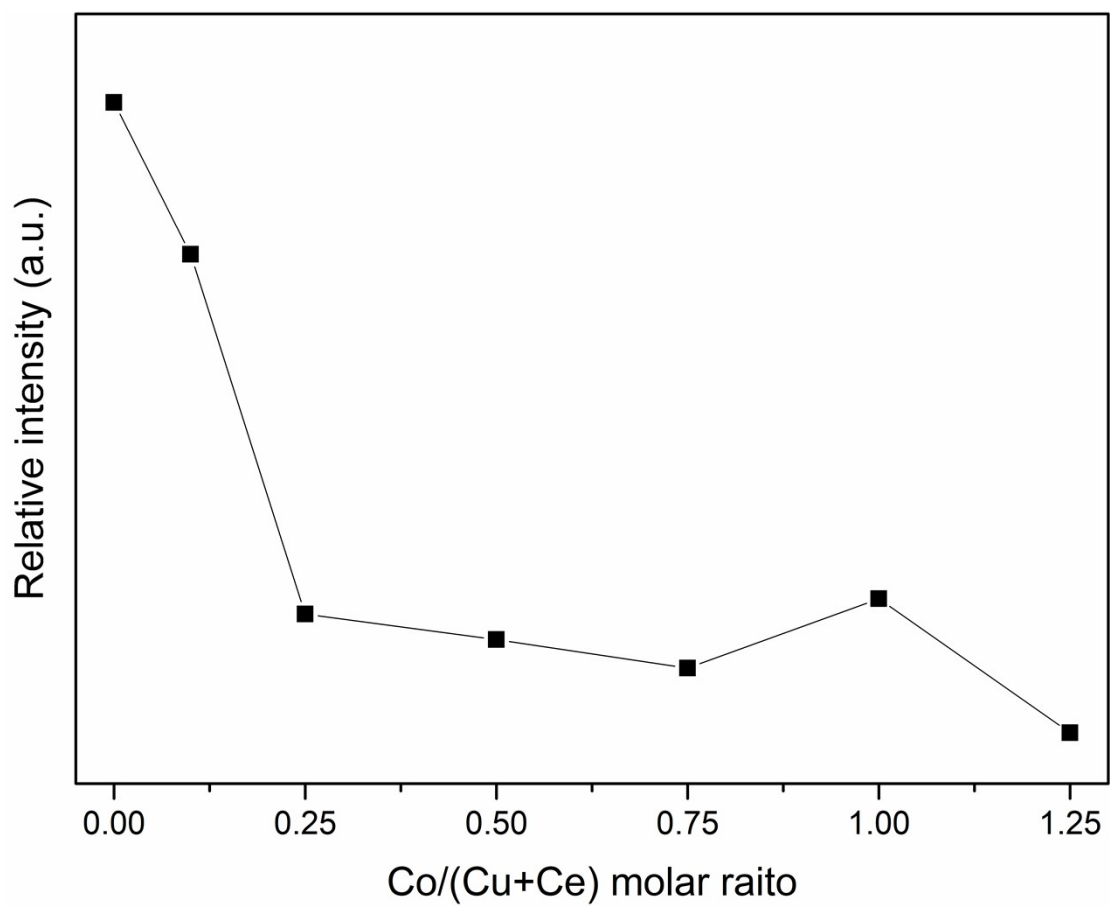

**Fig. S6** Relative intensity of Cu<sup>+</sup>-carbonyl peak at 90 °C of *in situ* DRIFTS spectra of the Co deposited CuO-CeO<sub>2</sub> catalysts.
